# Supplementary material for: Comparing Impacts of Different Bowel Cleansing Agents and Oral Probiotics After Cleansing On Symptom and Microbiota: a Randomized Placebo-Controlled Trial
Source: Research Square preprint supplement (doi:10.21203/rs.3.rs-1228536/v1), 2022-01-11
Supplement: Supplementary file 1 [file 27a40a9e1b9eedc785fd08c6.docx]

**Table S4** Individual events in each experimental group

| **Variable** | **Mirabilite** | |  | **PEG** | |
| --- | --- | --- | --- | --- | --- |
| **Placebo**  **(M1 group)** | **Probiotics**  **(M2 group)** |  | **Placebo**  **(P1 group)** | **Probiotics**  **(P2 group)** |
| ***Spicy intolerance*** |  |  |  |  |  |
| Baseline | 0 | 2 (22.2%) |  | 0 | 1 (10%) |
| 1 month | 1 (10%) | 1 (11.1%) |  | 0 | 0 |
| 1 year | 2 (20%) | 0 |  | 1 (9.1%) | 0 |
| ***Increased appetite*** |  |  |  |  |  |
| 1 month | 3 (30%) | 5 (55.6%) |  | 1 (9.1%) | 3 (30%) |
| 1 year | 2 (20%) | 3 (33.3%) |  | 3 (27.3%) | 1 (10%) |
| ***Increased stool frequency*** |  |  |  |  |  |
| 1 month | 1 (10%) | 3 (33.3%) |  | 2 (18.2%) | 5 (50%) |
| 1 year | 1 (10%) | 0 |  | 2 (18.2%) | 4 (40%) |

PEG, polyethylene glycol; Values are n (%).
