# Supplementary material for: Comparing Impacts of Different Bowel Cleansing Agents and Oral Probiotics After Cleansing On Symptom and Microbiota: a Randomized Placebo-Controlled Trial
Source: Research Square preprint supplement (doi:10.21203/rs.3.rs-1228536/v1), 2022-01-11
Supplement: Supplementary file 2 [file 502baef72c7aa0508082fa1d.docx]

**Table S3** Abdominal symptom scores and BMI in each experimental group

| **Variable** | **Mirabilite** | |  | **PEG** | |  | ***P*-value** | | |
| --- | --- | --- | --- | --- | --- | --- | --- | --- | --- |
| **Placeboa**  **(M1 group)** | **Probioticsb**  **(M2 group)** |  | **Placeboc**  **(P1 group)** | **Probioticsd**  **(P2 group)** |
| ***Abdominal symptom scores*** |  |  |  |  |  |  | **a vs c** | **a vs b** | **c vs d** |
| Baseline | 0.4±0.52 | 0.99±1.65 |  | 0.33±0.64 | 1.15±2.38 |  |  |  |  |
| 1 month | 1.20±1.32 | 0.55±1.01 |  | 0.60±0.93 | 0.70±1.64 |  | 0.243 | 0.053 | 0.340 |
| 1 year | 0.3±0.48 | 0.11±0.33 |  | 0.18±0.60 | 0.25±0.79 |  | 0.750 | 0.600 | 0.334 |
| ***BMI (kg/m2)*** |  |  |  |  |  |  |  |  |  |
| Baseline | 20.47±2.60 | 20.37±1.71 |  | 20.22±2.01 | 20.01±2.89 |  |  |  |  |
| 1 year | 20.19±1.24 | 20.52±3.15 |  | 20.19±3.13 | 19.81±1.71 |  | 0.614 | 0.733 | 0.226 |

BMI, body mass index; PEG, polyethylene glycol; Values are mean ± standard deviation.
