# Supplementary material for: Comparing Impacts of Different Bowel Cleansing Agents and Oral Probiotics After Cleansing On Symptom and Microbiota: a Randomized Placebo-Controlled Trial
Source: Research Square preprint supplement (doi:10.21203/rs.3.rs-1228536/v1), 2022-01-11
Supplement: Supplementary file 3 [file 6cfd568637965a37d610f854.docx]

**Table S2** Time taken, volume of solution and defecation frequency related to bowel preparation

| **Variable** | **Mirabilite**  **(n=19)** | **PEG**  **(n=21)** | ***P*-value** |
| --- | --- | --- | --- |
| Volume  of solution (ml) | 1876±422.5 | 2724±382.9 | <0.001 |
| Frequency  of defecation (time) | 5±1.6 | 5±1.7 | 0.378 |
| Time  of bowel preparation (hr) | 1.42±0.5 | 1.73±0.6 | 0.083 |

PEG, polyethylene glycol; Values are mean ± standard deviation.
