# Supplementary material for: Comparing Impacts of Different Bowel Cleansing Agents and Oral Probiotics After Cleansing On Symptom and Microbiota: a Randomized Placebo-Controlled Trial
Source: Research Square preprint supplement (doi:10.21203/rs.3.rs-1228536/v1), 2022-01-11
Supplement: Supplementary file 4 [file a28ae132b03c61f6e653c129.docx]

**Table S1** Detailed condition of qPCR

| **Genes** | **16S** | **β-actin** |
| --- | --- | --- |
| **Reaction** |  |  |
| Forward primer | ACTCCTACGGGAGGCAGCAG | TCACCCACACTGTGCCCATCTACGA |
| Reverse primer | GGACTACHVGGGTWTCTAAT | CAGCGGAACCGCTCATTGCCAATGG |
| Annealing temp (℃) | 58 | 58 |
| Template (ul) | 2 | 2 |
| PCR products (bp) | 450 | 259 |
| **Amplification efficiency of standard substance** |  |  |
| Slope | -3.4344 | -3.2905 |
| Y-Inter | 41.003 | 37.126 |
| R2 | 0.9978 | 0.9867 |
| Efficiency% | 95.51 | 101.33 |

**Reagent**: 2X ChamQ SYBR Color qPCR Master Mix (Vazyme, Nanjin, China)
